# Supplementary material for: Effective Strategies to Recruit Young Adults Into the TXT2BFiT mHealth Randomized Controlled Trial for Weight Gain Prevention
Source: PubMed Central journal article supplement (PMC4526902; doi:10.2196/resprot.4268), 2015-06-05
Supplement: resprot_v4i2e66_app1.pdf [file resprot_v4i2e66_app1.pdf]

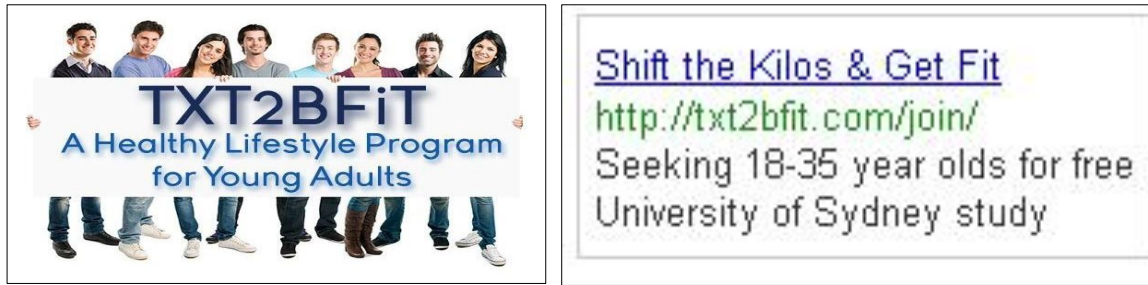

Figure 2 Example of Facebook and Google recruitment advertising

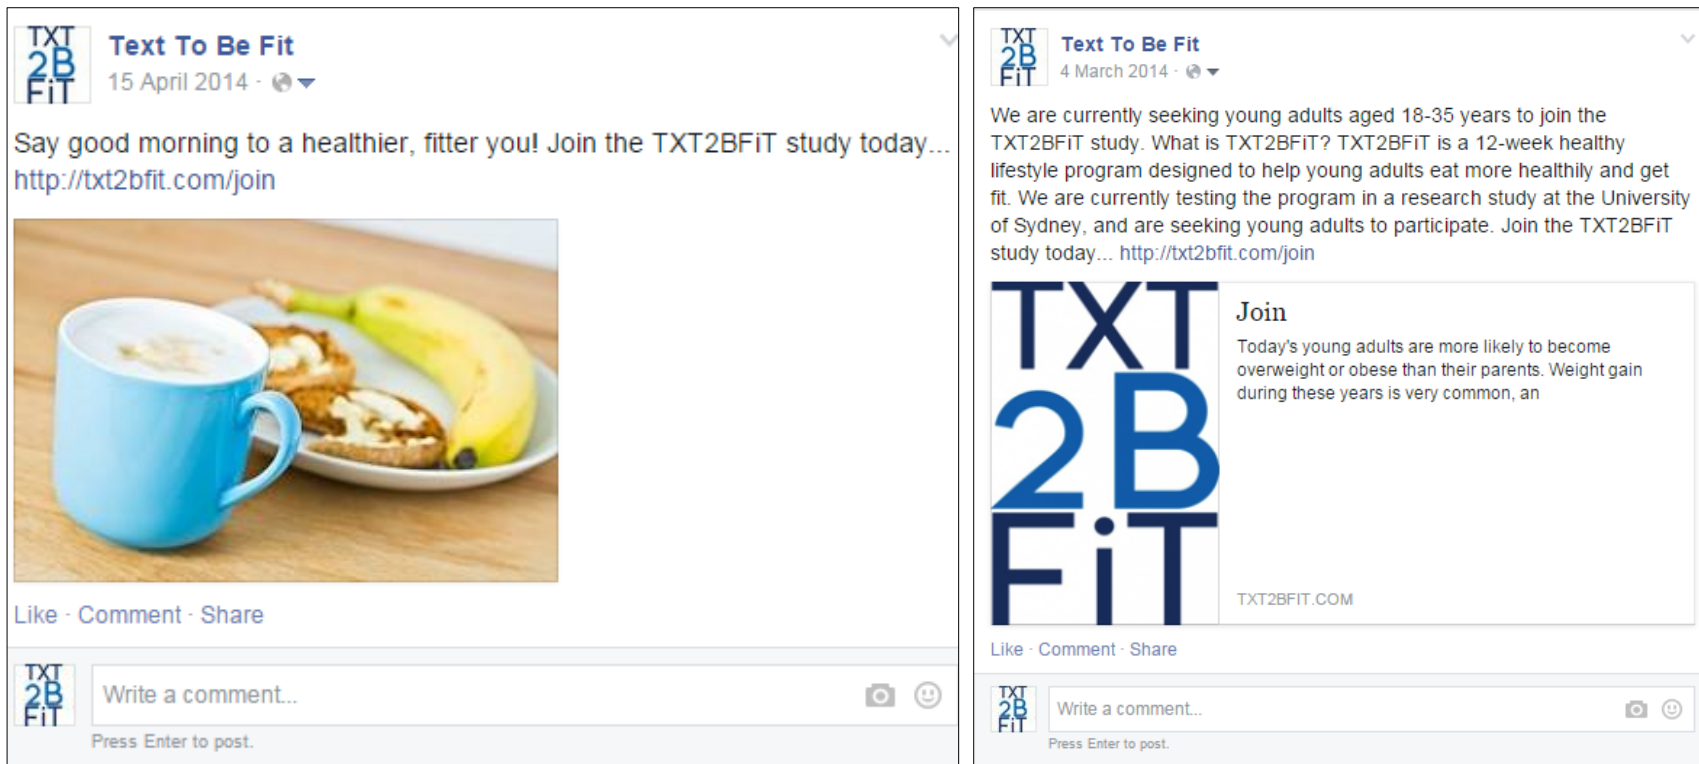

Figure 3 Example of Social Media (Facebook) recruitment advertising

**GAINED  
A FEW  
KILOS?**

**TXT  
2B  
FIT**

 THE UNIVERSITY OF SYDNEY

**Are you...**

**18-35 years old?**  
**Wanting to get fit?**

**TXT2BFIT is...**

**Free**  
**Flexible**  
**Mobile phone-based**

 **Want more info?**

**Contact us at**  
**info.txt2bfit@sydney.edu.au or at**  
**9351 3815 or check out our**  
**website at**  
**www.txt2bfit.com/join/ to see if**  
**this study is right for you!**

**Figure 4** Example print media recruitment advertising for posters, newspaper and magazine advertisements
